# Supplementary material for: Snapshot photoacoustic topography through an ergodic relay of optical absorption in vivo
Source: Springer Nature journal article supplement (doi:10.1038/s41596-020-00487-w), 2021-04-12
Supplement: MOESM3 [file 41596_2020_487_MOESM3_ESM20.zip]

**Supplementary Data 1: 3D model and parts-list for the animal holder**

The 3D assembly of the animal holder is shown in the figure below:


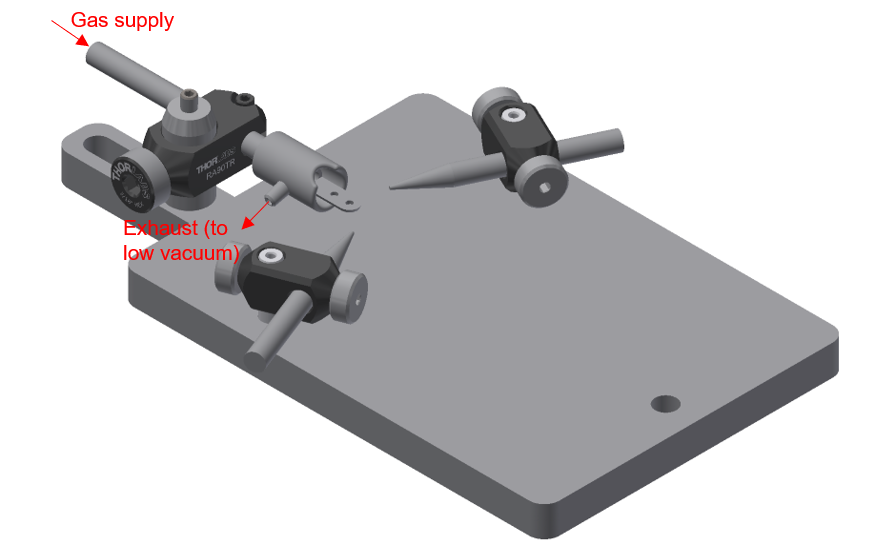


The animal holder is lab-made using 3D printing. The 3D models of the components can be downloaded through the following link: <https://figshare.com/articles/media/3D_model_for_the_animal_holder/12966731>

The 3D printed components are listed below:

- Part 1: Animal holder base
- Part 2: Tooth bar
- Part 3: Nose cone
- Part 4: Ear bar (×2)

The components that can be purchased from Thorlabs Inc. are listed below.

- RA90TR
- TR1
- MS1R (×2)
- MSRA90 (×2)
